Supplemental Figures and Tables.

Table S1. Feathers tested in this study, sample size in parentheses. Width (chord) measured at  $\frac{3}{4}$  of the length of the feather, i.e. before tapering. See also Fig. 5 for drawings of feather shape.

| Species                                                                                | Feather<br>(N) | Width,<br><i>w</i><br>(mm) | Length<br><i>l</i> (mm) | Feather<br>Mass<br>(mg) | Estimated Added<br>Mass (mg) <sup>1</sup> |
|----------------------------------------------------------------------------------------|----------------|----------------------------|-------------------------|-------------------------|-------------------------------------------|
| Anna's Hummingbird <i>Calypte anna</i> Lesson 1829                                     | R5 (2)         | 3.5                        | 32                      | 4.4                     | 0.37                                      |
| Costa's Hummingbird <i>Calypte costae</i> Bourcier 1839                                | R5 (1)         | 1.6                        | 22                      | 0.8                     | 0.054                                     |
| Costa's Hummingbird                                                                    | R4 (1)         | 3.9                        | 23                      | 1.4                     | 0.34                                      |
| Black-chinned Hummingbird<br><i>Archilochus alexandri</i> Bourcier<br>and Mulsant 1846 | R5 (2)         | 3.8                        | 23                      | 1.5                     | 0.32                                      |
| Black-chinned Hummingbird                                                              | R4 (1)         | 5.2                        | 25                      | 1.6                     | 0.65                                      |
| Ruby-throated Hummingbird<br><i>Archilochus colubris</i> Linnaeus<br>1758              | R5 (1)         | 3.5                        | 25                      | 1.2                     | 0.29                                      |
| Allen's Hummingbird <i>Selasphorus sasin</i> Lesson 1829                               | R5 (1)         | 1.4                        | 19                      | 0.7                     | 0.036                                     |
| Allen's Hummingbird                                                                    | R4 (2)         | 1.9                        | 19                      | 0.8                     | 0.066                                     |
| Allen's Hummingbird                                                                    | R3 (1)         | 3.4                        | 22                      | 0.9                     | 0.24                                      |
| Allen's Hummingbird                                                                    | R2 (1)         | 3.6                        | 22                      | 1.3                     | 0.27                                      |
| Rufous Hummingbird <i>S. rufus</i><br>Gmelin 1788                                      | R5 (1)         | 2.6                        | 20                      | 0.9                     | 0.13                                      |
| Rufous Hummingbird                                                                     | R4 (1)         | 3.6                        | 24                      | 1.0                     | 0.30                                      |
| Rufous Hummingbird                                                                     | R3 (1)         | 4.7                        | 24                      | 1.3                     | 0.51                                      |
| Rufous Hummingbird                                                                     | R2 (1)         | 6.0                        | 26                      | 1.3                     | 0.90                                      |
| Broad-tailed Hummingbird <i>S. platycercus</i> Swainson 1827                           | R2 (1)         | 6.7                        | 32                      | 2.0                     | 1.4                                       |
| Scintillant Hummingbird <i>S. scintilla</i> Gould 1850                                 | R2 (1)         | 5.8                        | 25                      | 1.1                     | 0.80                                      |
| Volcano Hummingbird <i>S. flammula torridus</i> Salvin 1870                            | R2 (1)         | 6.9                        | 26                      | 1.3                     | 1.2                                       |
| Volcano Hummingbird                                                                    | R3 (1)         | 6.5                        | 27                      | 1.6                     | 1.1                                       |
| Calliope Hummingbird <i>S. calliope</i><br>Gould 1847                                  | R3 (1)         | 5.4                        | 19                      | 1.5                     | 0.53                                      |
| Calliope Hummingbird <i>S. calliope</i>                                                | R2 (1)         | 5.2                        | 18                      | 1.3                     | 0.47                                      |
| Calliope Hummingbird <i>S. calliope</i>                                                | R1 (1)         | 4.6                        | 16                      | 1.2                     | 0.32                                      |
| White-bellied Woodstar<br><i>Chaetocercus mulsant</i> Bourcier<br>1842                 | R4 (2)         | 0.88                       | 24                      | 1.7                     | 0.018                                     |
| White-bellied Woodstar                                                                 | R3 (1)         | 3.2                        | 25                      | 0.7                     | 0.25                                      |
| Magenta-throated Woodstar                                                              | R5 (1)         | 3.5                        | 34                      | 2.5                     | 0.40                                      |

|                                                                         |        |     |    |     |      |
|-------------------------------------------------------------------------|--------|-----|----|-----|------|
| <i>Philodice bryantae</i> Lawrence 1867                                 |        |     |    |     |      |
| Purple-throated Woodstar <i>P. mitchellii</i> Mulsant and Verreaux 1866 | R5 (1) | 2.4 | 30 | 1.8 | 0.17 |
| Purple-throated Woodstar                                                | R4 (1) | 3.5 | 32 | 1.7 | 0.38 |
| Bahama Sheartail <i>Calothorax e. evelynae</i> Bourcier 1847            | R5 (1) | 4.4 | 30 | 2.2 | 0.56 |

<sup>1</sup> estimated as a cylinder of air around the feather,  $= \rho w^2 l \pi / 4$ .

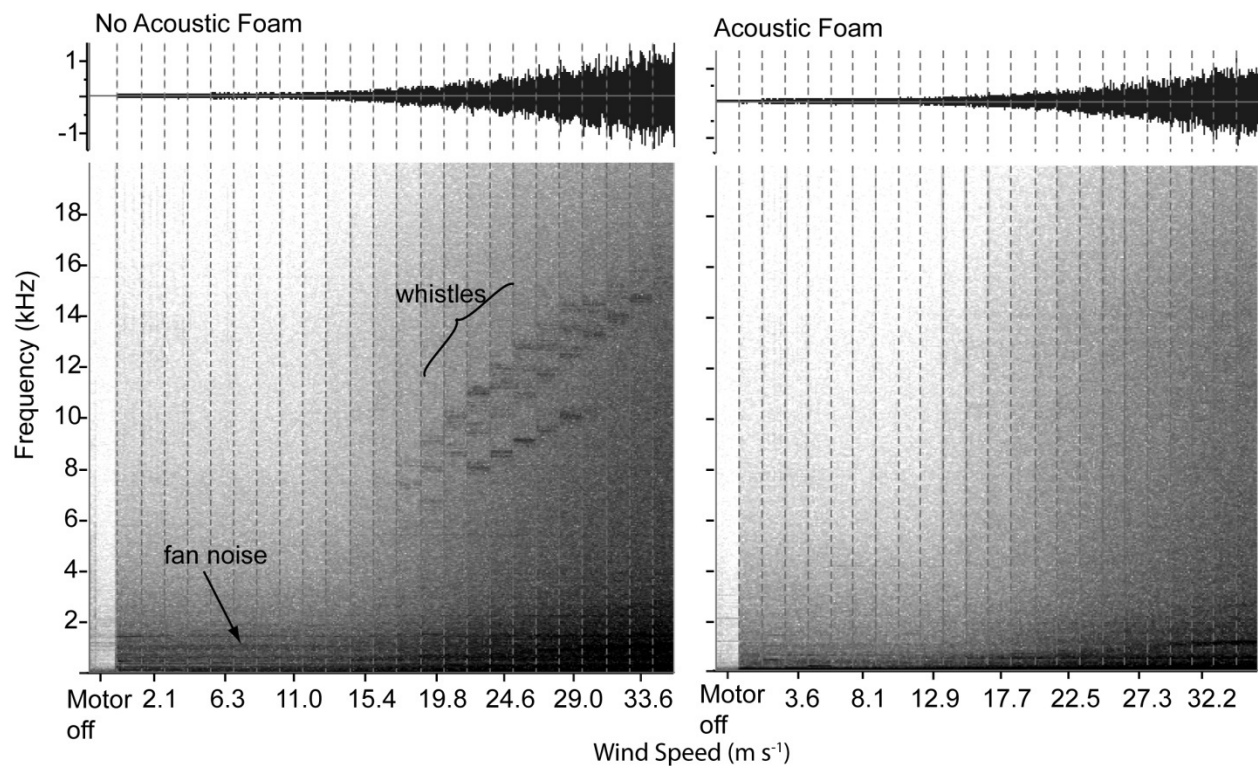

Figure S1. Waveform (above) and sound spectrograms (below) of the background sound of the wind tunnel as a function of airspeed ( $U_{air}$ ), without (left) and with (right) acoustic treatment of the wind tunnel. Sound samples separated by dashed lines. Each sample is of 5 seconds of sound, recorded at a fixed  $U_{air}$ . Without the acoustic foam, interval between samples is  $1.48 \text{ m s}^{-1}$ ; with the foam, interval is  $1.58 \text{ m s}^{-1}$ . The motor of the wind tunnel produced significant levels of sound, even with the fan off (compare ‘motor off’ sample to its neighbor); at higher  $U_{air}$ , fixtures within the tunnel created aerodynamic whistles that were individually eliminated.

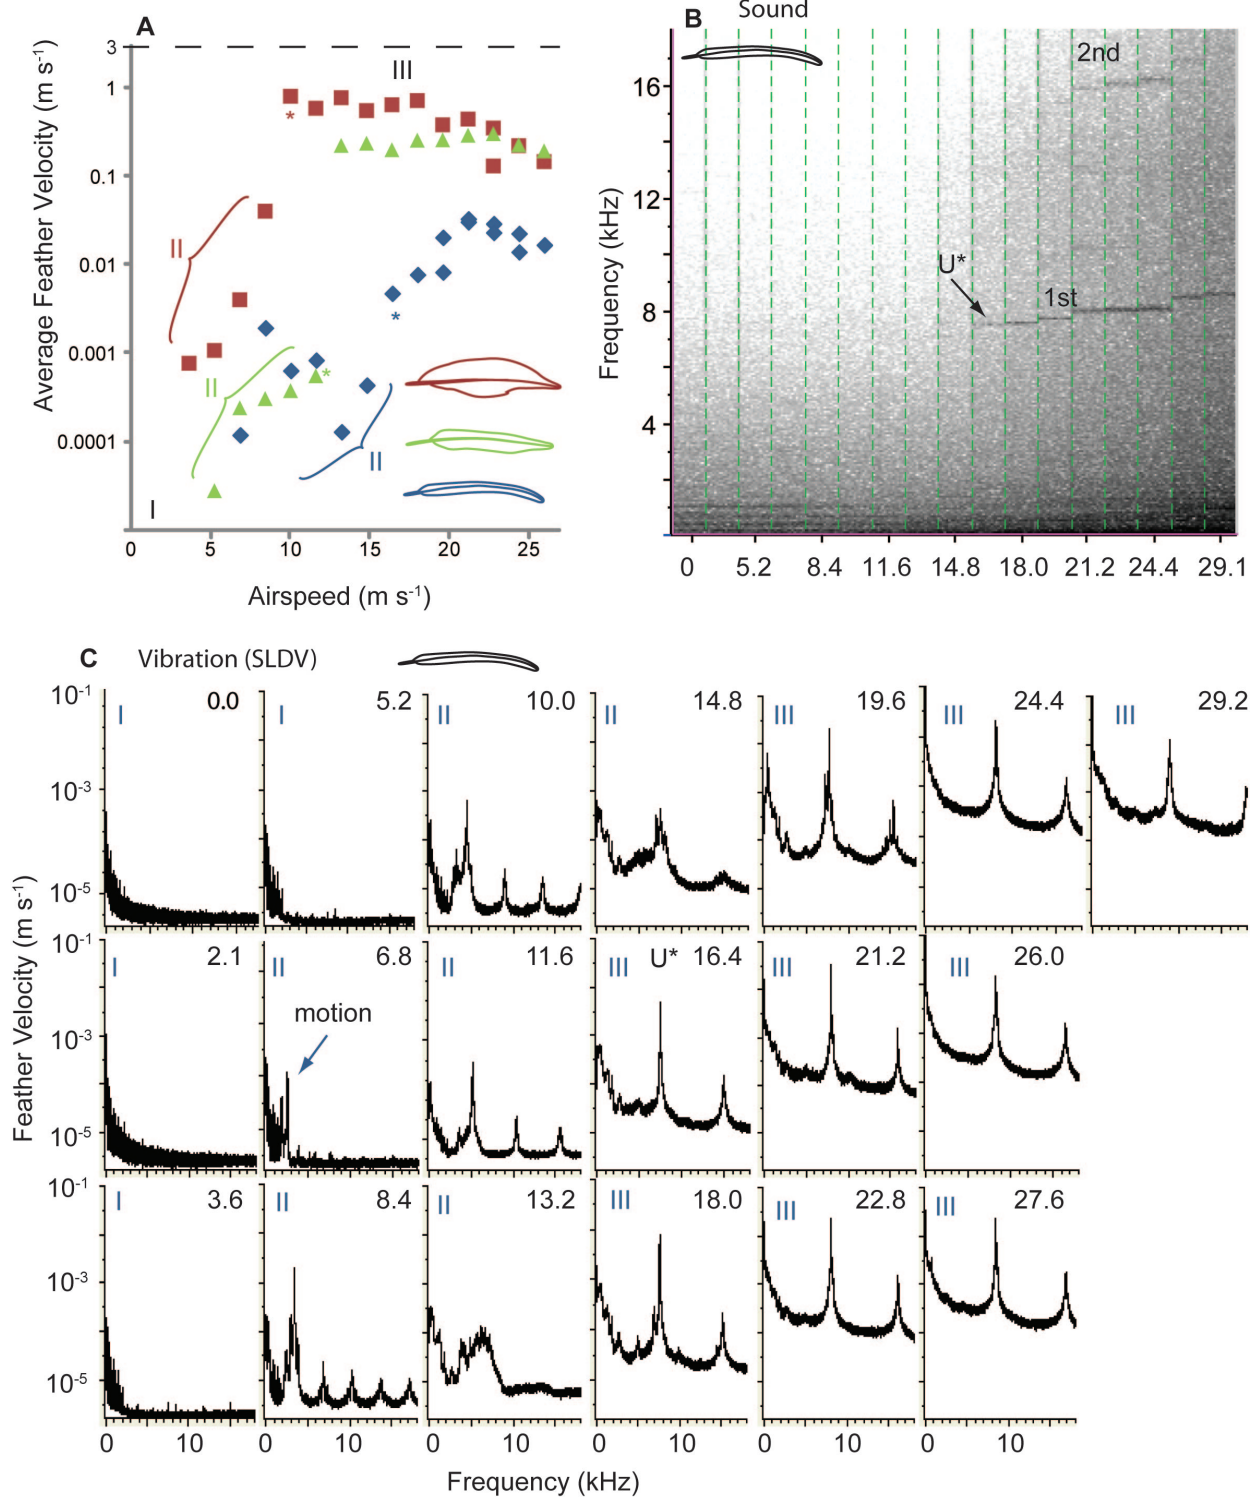

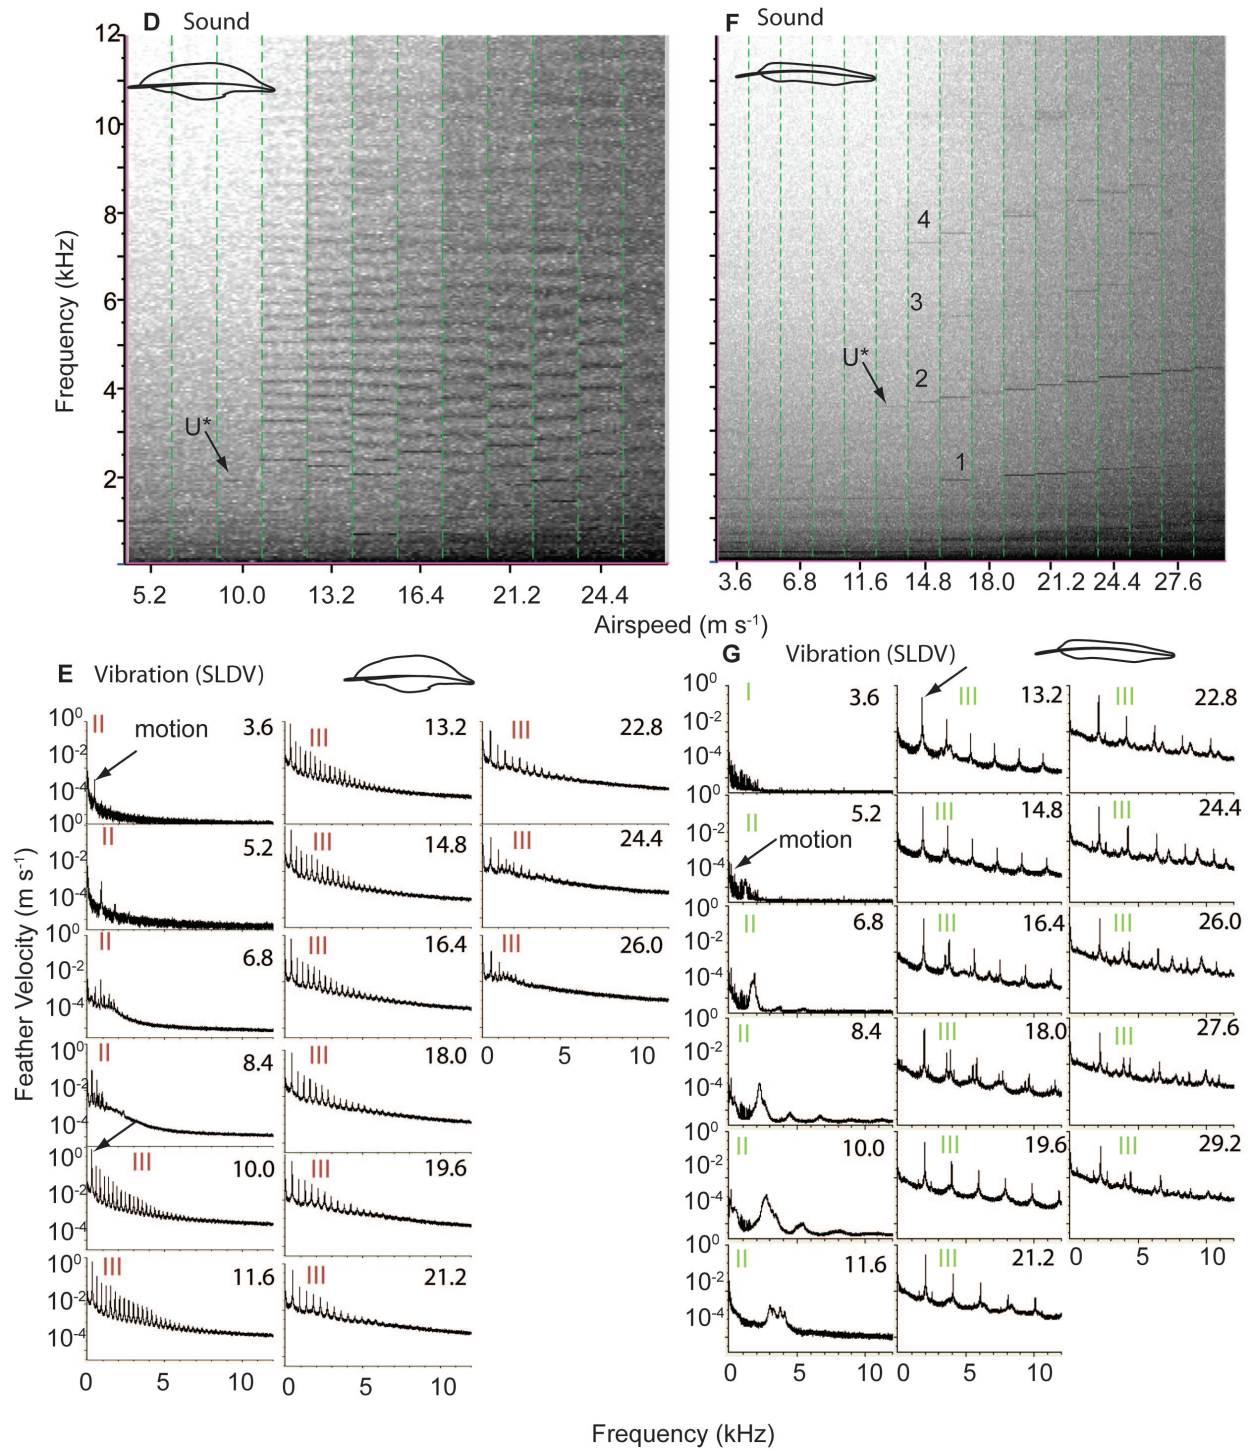

Figure S2. Sound production and flutter amplitude as a function of airspeed ( $U_{\text{air}}$ ), for the hummingbird tail-feathers Costa's R5 (blue), Broad-tailed R2 (red), and Black-chinned R5 (green). **A.** Velocity of the peak frequency of vibration as a function of airspeed. All feathers exhibited varying magnitudes of flutter that fit into three ranges. Range I: at low  $U_{\text{air}}$ , no motion

was detected (no data present). Range II: at intermediate  $U_{\text{air}}$ , small amplitude vibrations recorded, but no sound detected (brackets). \* = sound was first detected. The transition from range II to range III occurs at a critical velocity ( $U^*$ ) characterized by an abrupt increase in vibration velocity. The SLDV had a maximum velocity of  $3 \text{ m s}^{-1}$  (dashed line) that biases downward the points in range III. **B-G**. sound spectrograms from Costa's R5 (**B**), Broad-tailed R2 (**D**), and Black-chinned R5 (**F**) over a range of  $U_{\text{air}}$ , accompanied by the corresponding velocity spectra for the fluttering feather (**C**, **E**, **G**). In **B**, **D**, and **F**, spectrograms from a 5-second sample of sound are each separated by a green dashed line. The speed at which sound was first detected is indicated with an asterisk;  $f$ , fundamental frequency; numbers are harmonics. In **F**, the fundamental frequency is difficult to see against the background sound of the tunnel. Feather velocity measured by SLDV is the average value of up to  $\sim 100$  points across the feather.
